# Supplementary material for: Identification of Dirofilaria immitis miRNA using illumina deep sequencing
Source: PubMed Central journal article supplement (PMC3598945; doi:10.1186/1297-9716-44-3), 2013-01-18
Supplement: 1297-9716-44-3-S3.pdf [file 1297-9716-44-3-S3.pdf]

Additional file 3. The nucleotide bias percentage at each position in miRNAs of *D. immitis*.

| Position | A(%)  | U (%) | C (%) | G(%)  | A+U(%) | G+C(%) |
|----------|-------|-------|-------|-------|--------|--------|
| 1        | 19.68 | 74.02 | 1.21  | 5.09  | 93.70  | 6.30   |
| 2        | 30.55 | 5.13  | 5.92  | 58.41 | 35.68  | 64.32  |
| 3        | 31.75 | 19.09 | 14.60 | 34.56 | 50.84  | 49.16  |
| 4        | 44.07 | 6.98  | 18.39 | 30.55 | 51.06  | 48.94  |
| 5        | 48.27 | 15.67 | 10.73 | 25.33 | 63.94  | 36.06  |
| 6        | 13.99 | 42.06 | 13.82 | 30.14 | 56.04  | 43.96  |
| 7        | 36.89 | 13.84 | 8.83  | 40.44 | 50.73  | 49.27  |
| 8        | 19.32 | 39.23 | 23.87 | 17.59 | 58.55  | 41.45  |
| 9        | 44.00 | 30.02 | 2.67  | 23.31 | 74.02  | 25.98  |
| 10       | 55.83 | 14.64 | 12.68 | 16.84 | 70.47  | 29.53  |
| 11       | 34.95 | 17.27 | 12.35 | 35.43 | 52.22  | 47.78  |
| 12       | 20.19 | 11.96 | 13.41 | 54.44 | 32.15  | 67.85  |
| 13       | 29.26 | 34.37 | 11.83 | 24.54 | 63.63  | 36.37  |
| 14       | 47.81 | 25.29 | 2.37  | 24.53 | 73.10  | 26.90  |
| 15       | 33.79 | 9.93  | 6.13  | 50.15 | 43.72  | 56.28  |
| 16       | 23.73 | 42.10 | 12.16 | 22.00 | 65.84  | 34.16  |
| 17       | 44.61 | 33.42 | 14.94 | 7.03  | 78.03  | 21.97  |
| 18       | 16.00 | 51.92 | 3.50  | 28.57 | 67.93  | 32.07  |
| 19       | 27.66 | 15.59 | 18.30 | 38.44 | 43.25  | 56.75  |
| 20       | 20.60 | 32.16 | 10.50 | 36.74 | 52.76  | 47.24  |
| 21       | 32.70 | 37.15 | 23.65 | 6.50  | 69.85  | 30.15  |
| 22       | 28.92 | 12.50 | 13.67 | 44.91 | 41.41  | 58.59  |
| 23       | 14.57 | 30.93 | 2.85  | 51.64 | 45.51  | 54.49  |
| 24       | 4.91  | 65.25 | 8.21  | 21.64 | 70.16  | 29.84  |
