# Supplementary material for: Identification of Dirofilaria immitis miRNA using illumina deep sequencing
Source: PubMed Central journal article supplement (PMC3598945; doi:10.1186/1297-9716-44-3), 2013-01-18
Supplement: 1297-9716-44-3-S4.pdf [file 1297-9716-44-3-S4.pdf]

-----CTGAGCATGGTTCTTAGTCATG----- t0009186 84  
-----TGAGCATGGTTCTTAGTCATG----- t0359615 1

//

mireap

Dirofilaria\_immites-novel-6 gi|170575627|ref|NW\_001891541.1|:21719:21794:+ 76(nt) -29.60(kcal/mol) MFEI=0.9

(A) ATGGGAGTAATGGCCTGGATTTTGTCCAAAGCGTTGTAATACAGCTTTGGCACCATTTCAGACCACTACACCTAATT Dirofilaria\_immites-novel-6 823

(B) .(((.( ((. ((. (((((.. (( ((((((((. . . . .)). . . . .))). . . . .))). . . . .))). . . . .))). . . . .))). . . . . .

(C) \*\*\*\*\*TTTGGCACCATTTCAGACCACT\*\*\*\*\* Dirofilaria\_immites-novel-6-3p 814

(D) \*\*\*\*\*TGGCCTGGATTTTGTCCAAAGC\*\*\*\*\* Dirofilaria\_immites-novel-6-5p 9

-----TGGCCTGGATTTTGTCCAAAGC----- t0063401 9  
-----TTTGGCACCATTTCAGACC----- t0920597 1  
-----TTTGGCACCATTTCAGACCA----- t0191576 2  
-----TTTGGCACCATTTCAGACCAC----- t0145036 3  
-----TTTGGCACCATTTCAGACCACT----- t0001733 446  
-----TTTGGCACCATTTCAGACCACTA----- t0002241 349  
-----TTGGCACCATTTCAGACCACT----- t0124724 4  
-----TTGGCACCATTTCAGACCACTA----- t0064940 9

//

mireap

Dirofilaria\_immites-novel-7 gi|170575775|ref|NW\_001891561.1|:10393:10477:+ 85(nt) -28.70(kcal/mol) MFEI=0.96

(A) ACTAAGTACCATTCTGGATGTTTCTCTGAGTCATATGTCAAATTTATATATCTACGACTAGAGGAACATTCAGCATTGGTTATGG Dirofilaria\_immites-novel-7 22

(B) .(((.. (((. (((((((((((((((((. ((((((((((((. . . . .)). . . . .))). . . . .))). . . . .))). . . . .))). . . . . .

(C) \*\*\*\*\*CGACTAGAGGAACATTCAGCA\*\*\*\*\* Dirofilaria\_immites-novel-7-3p 22

-----CGACTAGAGGAACATTCAGC----- t0054122 11  
-----CGACTAGAGGAACATTCAGCA----- t0053684 11

//

mireap

Dirofilaria\_immites-novel-8 gi|170585917|ref|NW\_001893004.1|:593289:593368:+ 80(nt) -28.50(kcal/mol) MFEI=0.89

(A) AGTAGGACAAGTGAGATTGATTTTCACTGGTACCTTTGCAGTATGTAGTTACCATGTTGATCGATCTCCATTGTTTCGTGT *Dirofilaria-immites-novel-8* 2754

(B) .... ((((((.. ((((((((((.. (( (((((... ((((. ....))))).)))))))).)))))))).))))))....

(C) \*\*\*\*\*TTACCATGTTGATCGATCTCCA\*\*\*\*\* *Dirofilaria-immites-novel-8-3p* 2754

|                                   |          |      |
|-----------------------------------|----------|------|
| -----TTACCATGTTGATCGATC-----      | t0143697 | 3    |
| -----TTACCATGTTGATCGATCT-----     | t0176884 | 3    |
| -----TTACCATGTTGATCGATCTC-----    | t0016255 | 45   |
| -----TTACCATGTTGATCGATCTCC-----   | t0001990 | 389  |
| -----TTACCATGTTGATCGATCTCCA-----  | t0000287 | 2299 |
| -----TTACCATGTTGATCGATCTCCAT----- | t0060833 | 10   |
| -----TACCATGTTGATCGATCTCCA-----   | t0180484 | 3    |
| -----CCATGTTGATCGATCTCCA-----     | t0728218 | 1    |
| -----CATGTTGATCGATCTCCA-----      | t0675113 | 1    |

//

mireap

*Dirofilaria-immites-novel-9* gi|170589762|ref|NW\_001893021.1|:5975911:5975989:+ 79(nt) -26.10(kcal/mol) MFEI=0.69

(A) TCGGTTTATCATGAGCAACTTTGCCTTCGTTGAGGGTAATTGACATCAACTTGGCTCTGCTGCTCAAGATGACGGTGCC *Dirofilaria-immites-novel-9* 4277

(B) .. (((. (((. ((((((. (... ((((. ((...)))...)))...)))).))))))....

(C) \*\*\*\*\*ATGAGCAACTTTGCCTTCGTTGA\*\*\*\*\* *Dirofilaria-immites-novel-9-5p* 4221

(D) \*\*\*\*\*AACTTGGCTCTGCTGCTCAAGA\*\*\*\*\* *Dirofilaria-immites-novel-9-3p* 56

|                                     |          |      |
|-------------------------------------|----------|------|
| -----CATGAGCAACTTTGCCTTCGTT-----    | t0804900 | 1    |
| -----CATGAGCAACTTTGCCTTCGTTGA-----  | t0112797 | 5    |
| -----ATGAGCAACTTTGCCTTC-----        | t0725680 | 1    |
| -----ATGAGCAACTTTGCCTTCGT-----      | t0027090 | 26   |
| -----ATGAGCAACTTTGCCTTCGTT-----     | t0018134 | 40   |
| -----ATGAGCAACTTTGCCTTCGTTG-----    | t0000767 | 965  |
| -----ATGAGCAACTTTGCCTTCGTTGA-----   | t0000199 | 3122 |
| -----ATGAGCAACTTTGCCTTCGTTGAG-----  | t0040616 | 16   |
| -----ATGAGCAACTTTGCCTTCGTTGAGG----- | t0173325 | 3    |



-----TATGGAACTGGCGAATACACGG----- t0068659 8

//

mireap

Dirofilaria-immites-novel-12 gi|170590627|ref|NW\_001893024.1|:500433:500517:+ 85(nt) -37.20(kcal/mol) MFEI=1.01

(A) CGGTTAAGCAATTCAGCTAATAAACTACTTCTGCTTGATGCGTACAGGTGCCGAGGTATTGTTTATTGGCTGAGTGCTATAACC Dirofilaria-immites-novel-12 1431640

(B) .(((.((((.((((((((((((((((.(((((.((((.(.....))))))....)))))).))))))))))))))))))))))))))))))))))))))))))

(C) \*\*\*\*\*CGAGGTATTGTTTATTGGCTGA\*\*\*\*\* Dirofilaria-immites-novel-12-3p

1431640

|                                    |                  |
|------------------------------------|------------------|
| -----CCGAGGTATTGTTTATTGGC-----     | t0299575 1       |
| -----CCGAGGTATTGTTTATTGGCT-----    | t0563825 1       |
| -----CCGAGGTATTGTTTATTGGCTG-----   | t0147594 3       |
| -----CCGAGGTATTGTTTATTGGCTGA-----  | t0007370 106     |
| -----CGAGGTATTGTTTATTGG-----       | t0005303 148     |
| -----CGAGGTATTGTTTATTGGC-----      | t0000183 3295    |
| -----CGAGGTATTGTTTATTGGCT-----     | t0000076 7116    |
| -----CGAGGTATTGTTTATTGGCTG-----    | t0000020 25340   |
| -----CGAGGTATTGTTTATTGGCTGA-----   | t0000001 1386004 |
| -----CGAGGTATTGTTTATTGGCTGAG-----  | t0000108 5033    |
| -----CGAGGTATTGTTTATTGGCTGAGT----- | t0081392 7       |
| -----GAGGTATTGTTTATTGGC-----       | t0075426 8       |
| -----GAGGTATTGTTTATTGGCT-----      | t0052999 12      |
| -----GAGGTATTGTTTATTGGCTG-----     | t0022648 31      |
| -----GAGGTATTGTTTATTGGCTGA-----    | t0000248 2637    |
| -----GAGGTATTGTTTATTGGCTGAG-----   | t0047501 13      |
| -----AGGTATTGTTTATTGGCT-----       | t0083213 7       |
| -----AGGTATTGTTTATTGGCTG-----      | t0022285 32      |
| -----AGGTATTGTTTATTGGCTGA-----     | t0000465 1524    |
| -----AGGTATTGTTTATTGGCTGAG-----    | t0262231 2       |

```
-----AGGTATTGTTTATTGGCTGAGT----- t0586900 1
-----GGTATTGTTTATTGGCTG----- t0098810 5
-----GGTATTGTTTATTGGCTGA----- t0004740 166
-----GGTATTGTTTATTGGCTGAG----- t0165444 3
-----GTATTGTTTATTGGCTGA----- t0005462 144
-----GTATTGTTTATTGGCTGAG----- t0395726 1
```

//

mireap

Dirofilaria\_immites-novel-13(1) gi|170593506|ref|NW\_001893039.1|:535278:535358:+ 81(nt) -21.74(kcal/mol) MFEI=0.95

(A) AAGTGAGTATTTGGCTTTCTTTGATATGAATGTAACGATTTAATATCATAATATCATACGAAAGCTGAAGATACTTTCTC Dirofilaria\_immites-novel-13 21

(B) .((((( (((((((((((((( (. (((((( (. (((.....)))))))))...)))))))).)))))))).

(C) \*\*\*\*\*TTTGGCTTTCTTTGATATGAATG\*\*\*\*\* Dirofilaria\_immites-novel-13-5p 21

```
-----TTTGGCTTTCTTTGATATGAA----- t0227204 2
-----TTTGGCTTTCTTTGATATGAAT----- t0122991 4
-----TTTGGCTTTCTTTGATATGAATG----- t0042627 15
```

//

mireap

Dirofilaria\_immites-novel-13(2) gi|170648757|ref|NW\_001914025.1|:283:363:- 81(nt) -21.74(kcal/mol) MFEI=0.95

(A) AAGTGAGTATTTGGCTTTCTTTGATATGAATGTAACGATTTAATATCATAATATCATACGAAAGCTGAAGATACTTTCTC Dirofilaria\_immites-novel-13 21

(B) .((((( (((((((((((((( (. (((((( (. (((.....)))))))))...)))))))).)))))))).

(C) \*\*\*\*\*TTTGGCTTTCTTTGATATGAATG\*\*\*\*\* Dirofilaria\_immites-novel-13-5p 21

```
-----TTTGGCTTTCTTTGATATGAA----- t0227204 2
-----TTTGGCTTTCTTTGATATGAAT----- t0122991 4
-----TTTGGCTTTCTTTGATATGAATG----- t0042627 15
```

//
